# Supplementary material
Source: bioRxiv or medRxiv preprint supplement (https://www.biorxiv.org/highwire/filestream/13805/field_highwire_adjunct_files/0/050641-1.pdf)

# Supplemental Figure 1 – Histology

NS15 (right) N=127/1

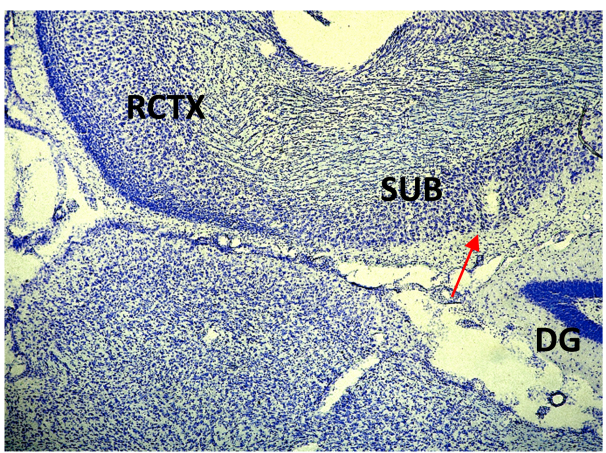

NS16 (right) N=42/4, N=98/14

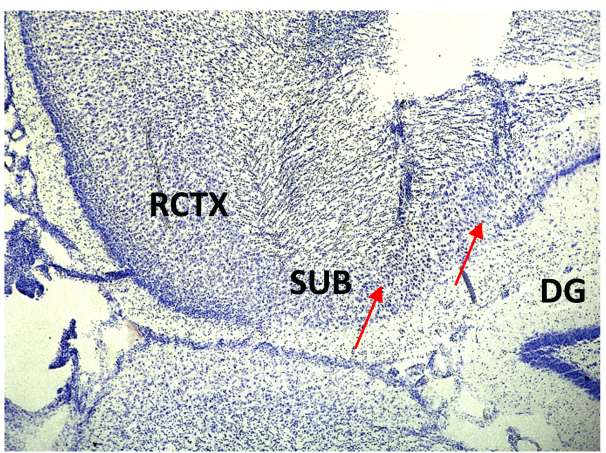

NS15 (left) N=194/6

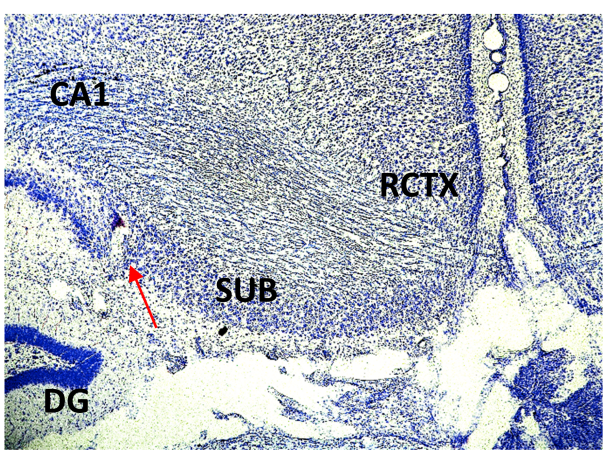

NS14 (right) N=81/22

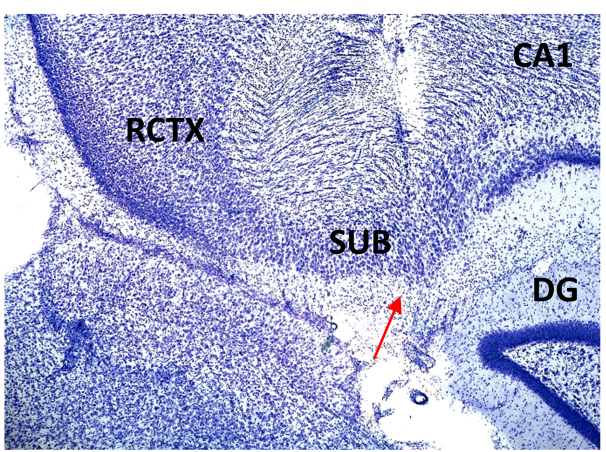

Supplement: Supplementary file [file 050641-1.pdf]
